# Supplementary material
Source: PubMed Central journal article supplement (PMC166818)

**1**

At1g01040  
 At1g01120  
 At1g01510  
 At1g01860  
 At1g02090  
 At1g02200  
 At1g02280  
 At1g02340  
 At1g02580  
 At1g02780

At1g04110  
 At1g04120  
 At1g04240  
 At1g04250  
 At1g04400  
 At1g04550  
 At1g04640  
 At1g05180

At1g05750  
 At1g05760  
 At1g05850  
 At1g06150  
 At1g06570

At1g08060  
 At1g08090  
 At1g08260  
 At1g08520  
 At1g08540  
 At1g08550  
 At1g08560  
 At1g08720  
 At1g09530  
 At1g09540  
 At1g09570  
 At1g09700

At1g10760

At1g11680

At1g12040  
 At1g12110  
 At1g12220  
 At1g12360  
 At1g12370  
 At1g12770  
 At1g12840  
 At1g13120

At1g13870  
 At1g13980  
 At1g14350  
 At1g14610  
 At1g14750  
 At1g14920

At1g15550

At1g15950

At1g16410

**2**

At2g01420

At2g01830

At2g01980

At2g02480

At2g03150

At2g03220

At2g03680

At2g04030

At2g05990

At2g06050

At2g13540

**3**

At3g01120

At3g01610

At3g02150

At3g02180

At3g02260

At3g02580

At3g02850

At3g02875

At3g03050

At3g04400

At3g04870

At3g07040

At3g07060

At3g08040

At3g08550

At3g09090

At3g09150

At3g10050

At3g11170

At3g11540

At3g11670

At3g11940

At3g11980

At3g12120

At3g12680

At3g13550

At3g13870

At3g14110

At3g14225

At3g15170

At3g15620

At3g15850

**4**

At4g00100

At4g00450

At4g00650

At4g00730

At4g01370

At4g02060

At4g02510

At4g02560

At4g02570

At4g02780

At4g02980

At4g03050

At4g03060

At4g03280

At4g04770

At4g04890

At4g08150

At4g08810

At4g08920

At4g09820

At4g10180

At4g10310

**5**

At5g01220

At5g02030

At5g02250

At5g02310

At5g02820

At5g03280

At5g03730

At5g03800

At5g03840

At5g03940

At5g04140

At5g04560

At5g04890

At5g05170

At5g05490

At5g05690

At5g05730

At5g07280

At5g07990

At5g08170

At5g09640

At5g09810

At5g09900

At5g10140

At5g11260

At5g11530

At5g12130

At5g12840

At5g13160

At5g13480

At5g13630

At5g13710

At5g13930

At5g13960

At5g14250

At5g14750

At5g15140

At5g15840

At5g16560

At5g16620

At5g16910

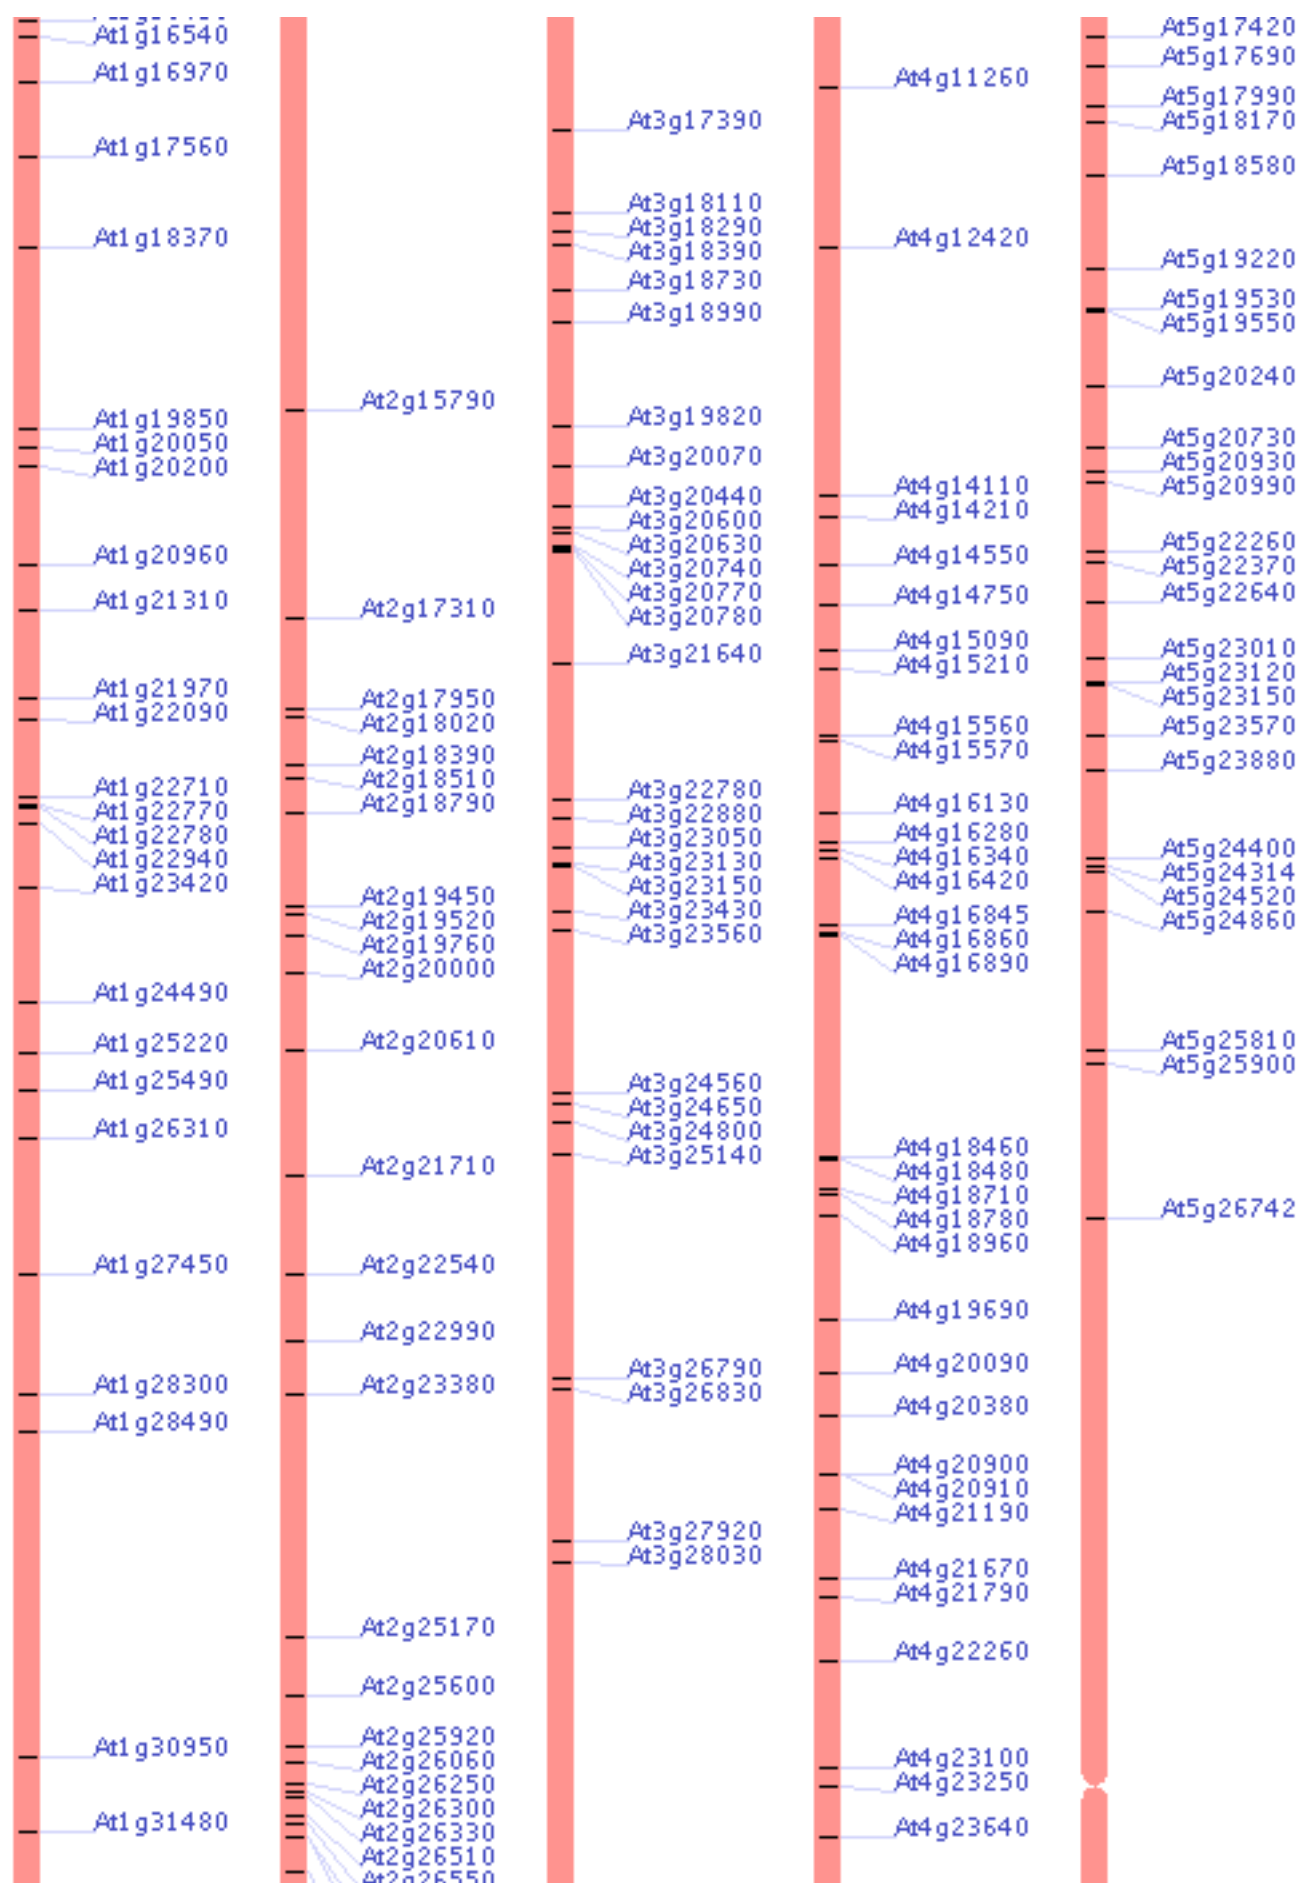

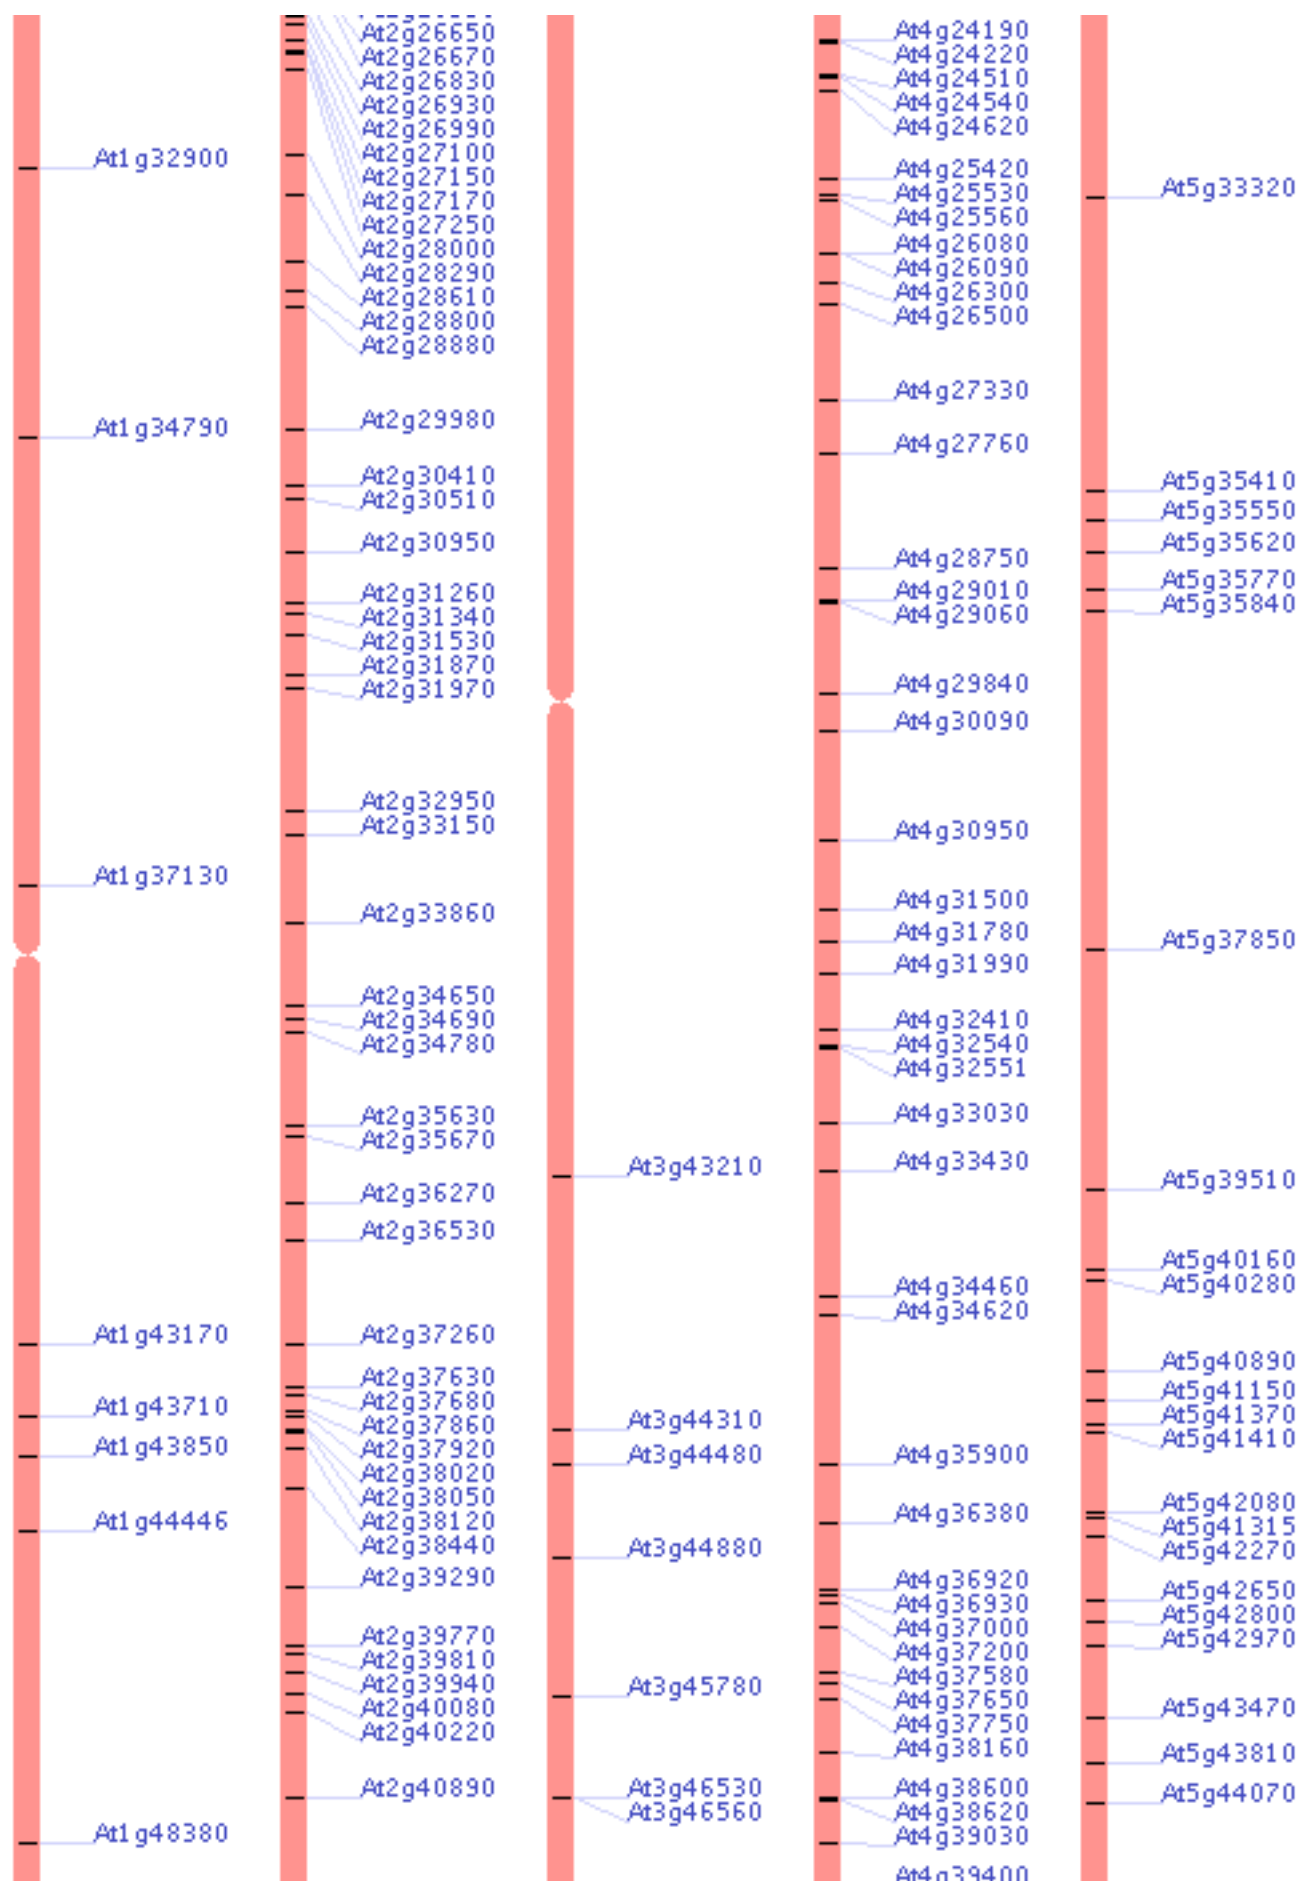

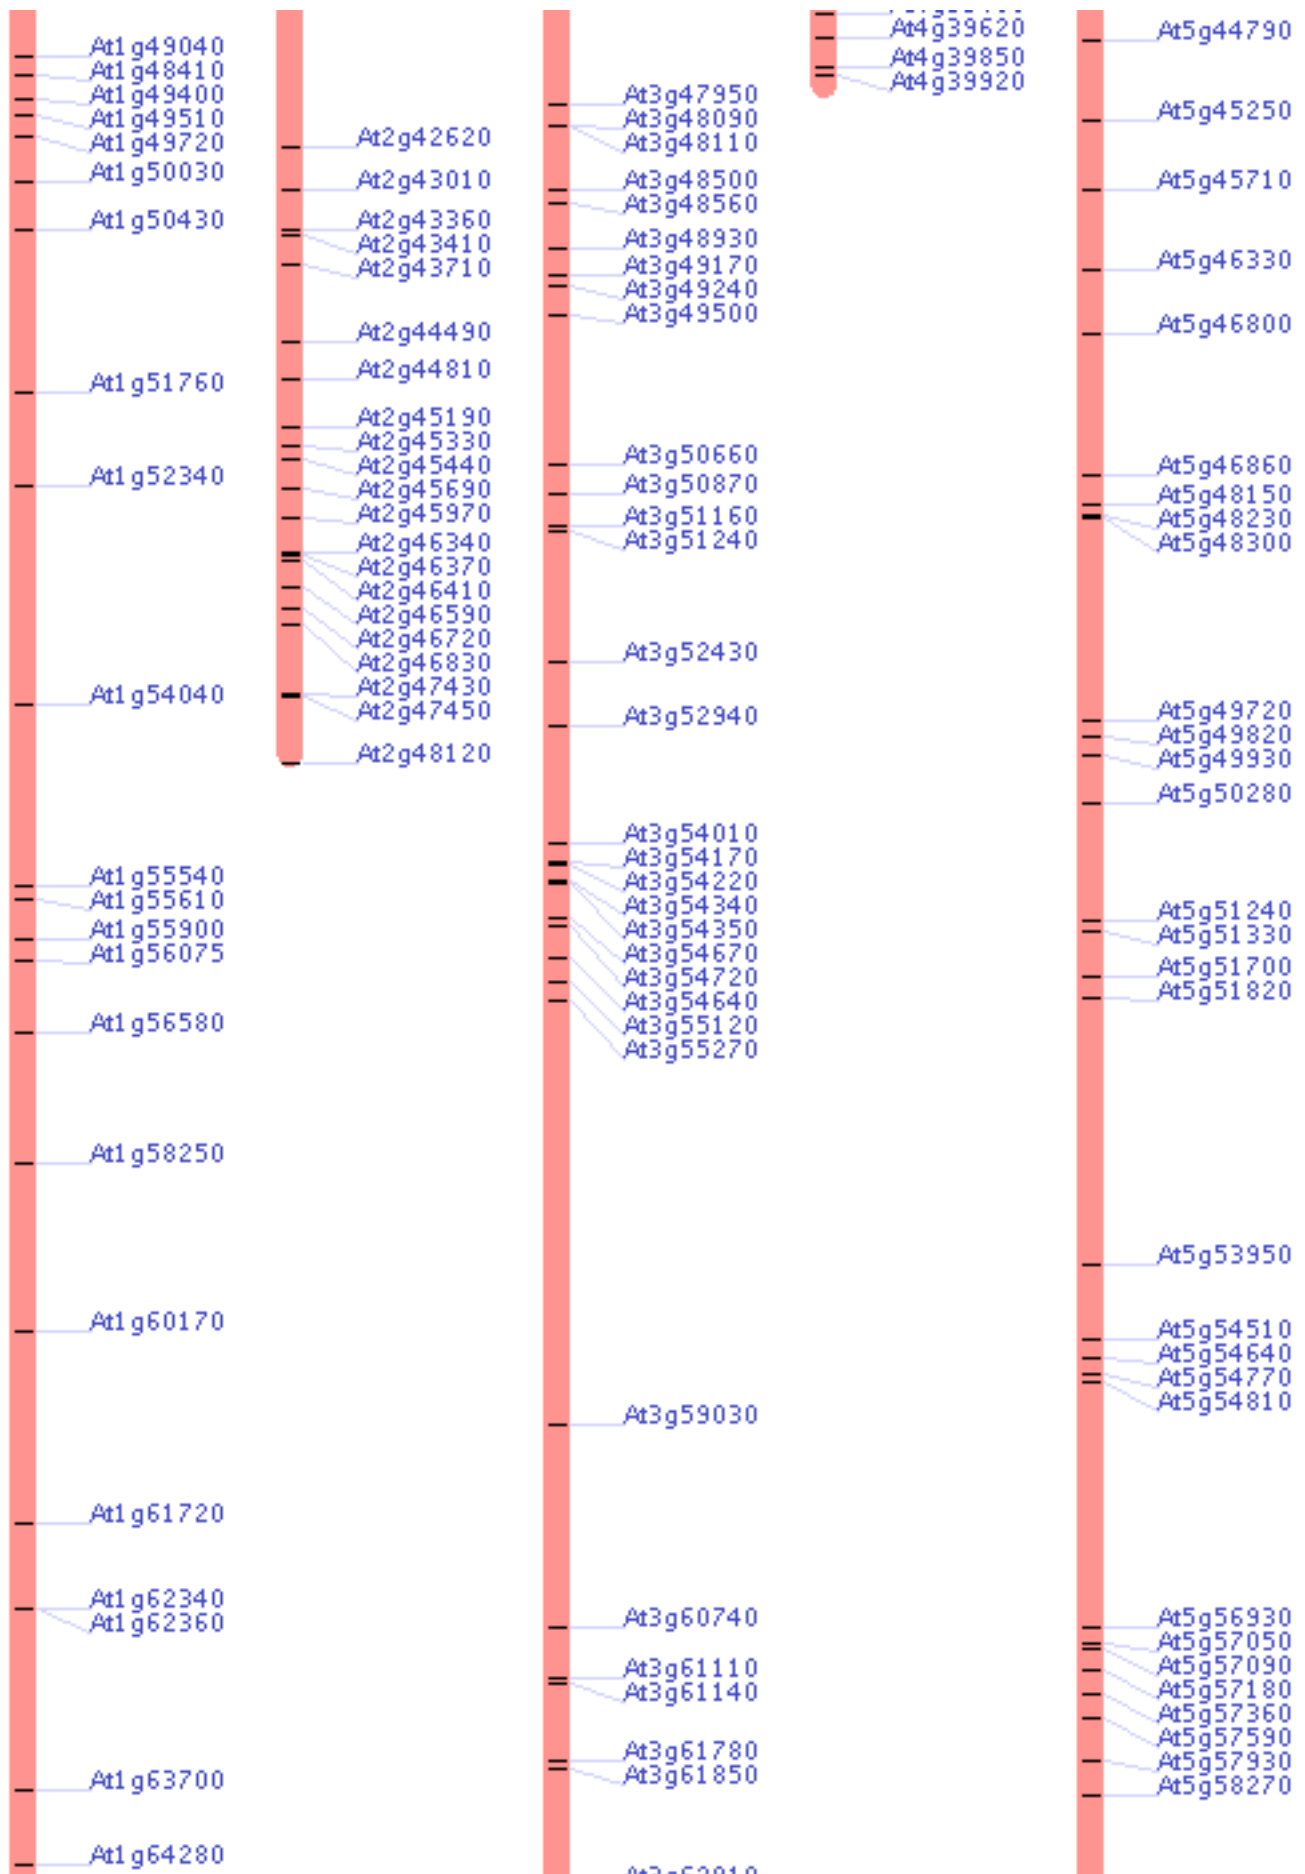



At3g62980

At1g64970

At1g65380  
At1g65470  
At1g65480  
At1g65620

At1g66340  
At1g66350  
At1g66520

At1g67370  
At1g67440

At1g68050  
At1g68100  
At1g68370  
At1g68530  
At1g67490  
At1g68560  
At1g68640  
At1g69120  
At1g69180

At1g70170

At1g70940  
At1g71190  
At1g71440

At1g72970

At1g73590

At1g74310  
At1g74330

At1g74960  
At1g75350

At1g75820  
At1g75950  
At1g76060

At1g77120

At1g77760  
At1g77860  
At1g78000

At1g78580  
At1g78630

At5g60690

At5g60890  
At5g60910  
At5g60920  
At5g61150  
At5g61380  
At5g61410  
At5g61460  
At5g61850  
At5g61900  
At5g62310  
At5g62410  
At5g62790  
At5g62810  
At5g62990  
At5g63840  
At5g63860  
At5g63980  
At5g64330  
At5g64630  
At5g64740  
At5g64860  
At5g64930

At5g65930  
At5g65940  
At5g66130  
At5g66350  
At5g66570  
At5g66750  
At5g67030  
At5g66055  
At5g67590

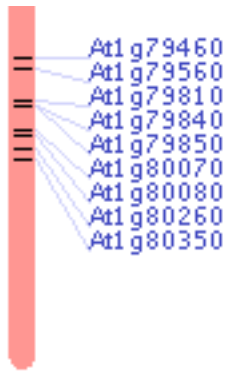

Supplement: plntphys_131_2_409__2.pdf [file plntphys_131_2_409__2.pdf]
