# Supplementary material
Source: PubMed Central journal article supplement (PMC166818)

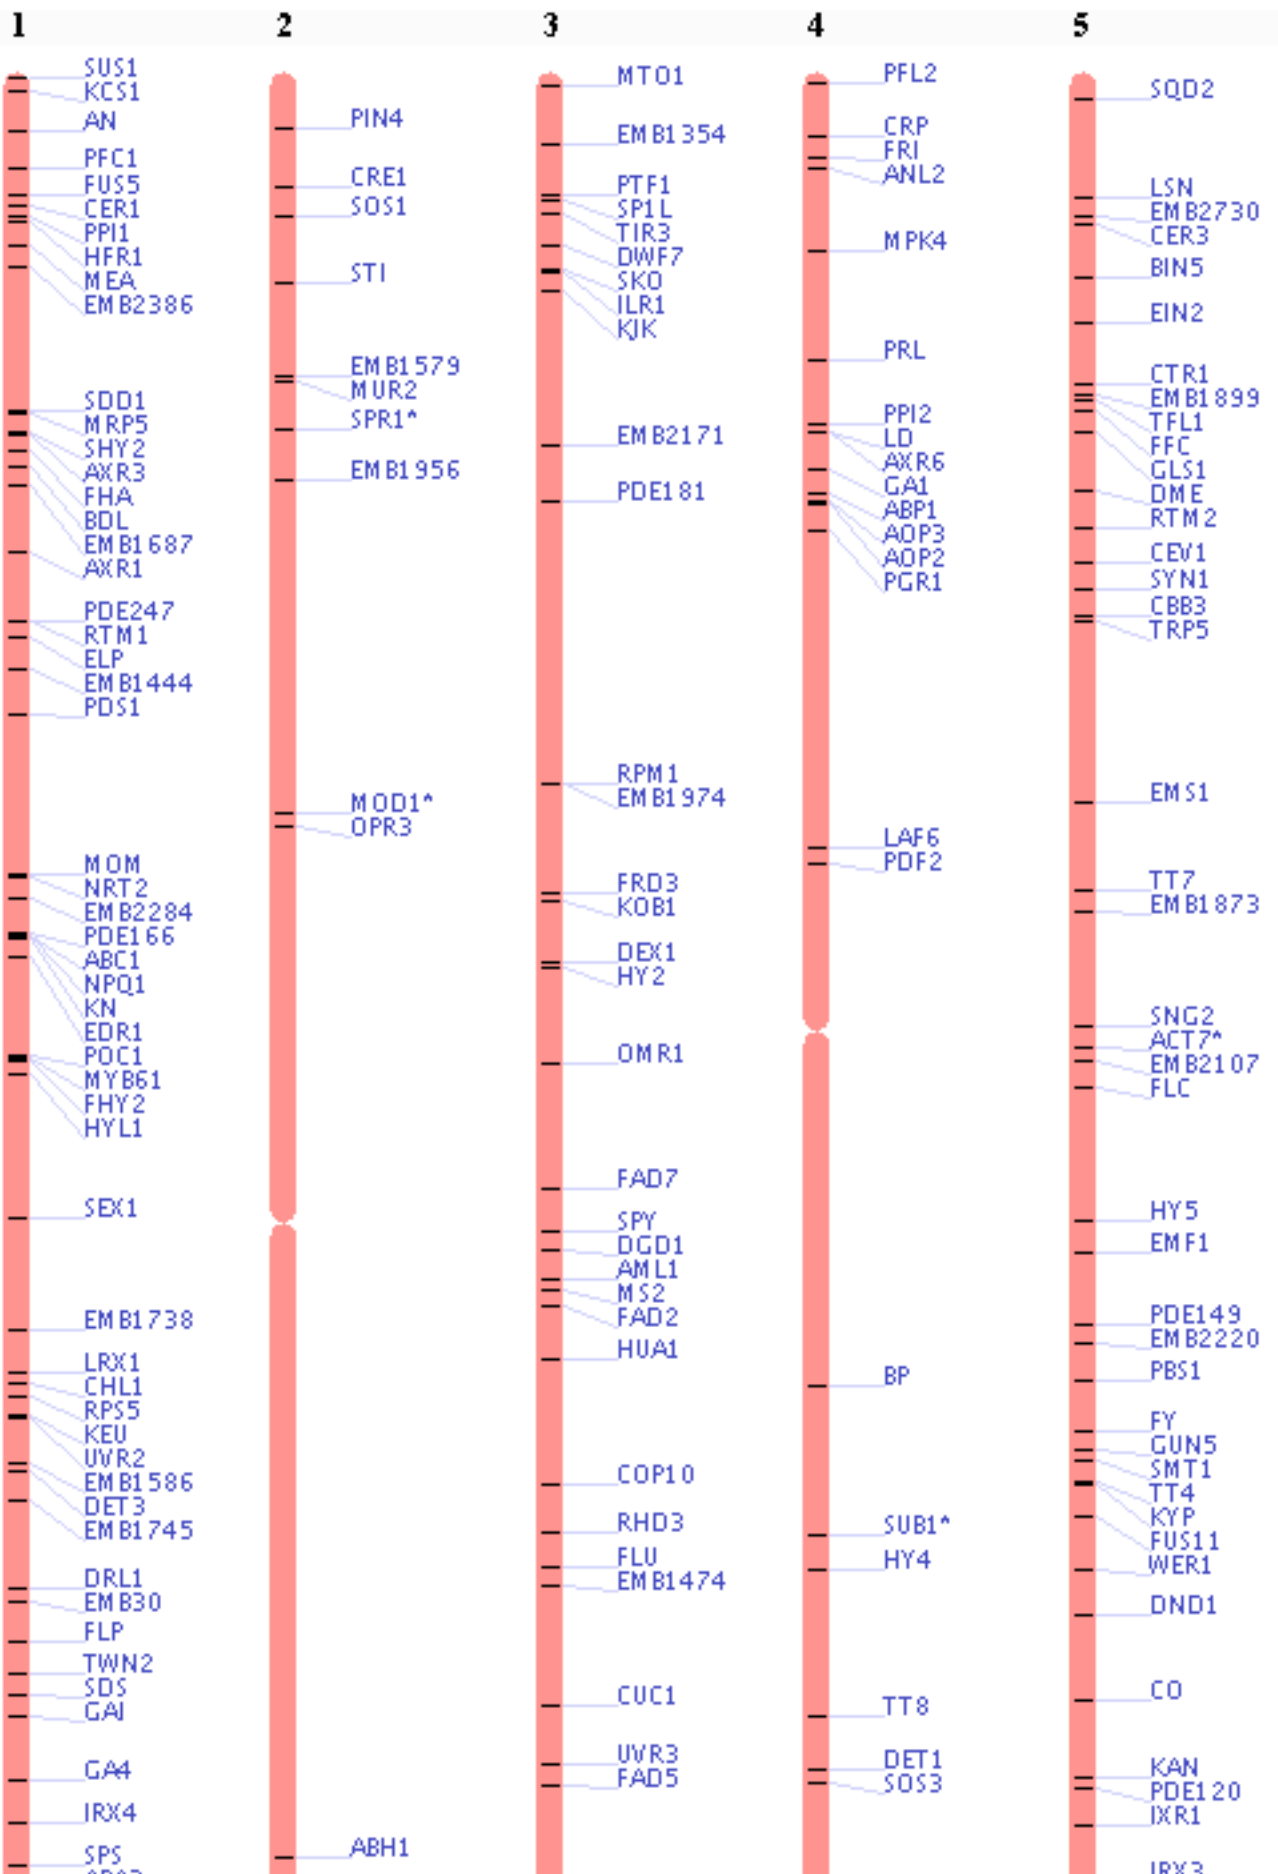

ABAS  
KU70  
  
HLL  
  
HIK  
  
  
MP  
HYD1  
EMB2719  
  
EMB1507  
RSH  
  
LEC1  
EMB2204  
  
SUC2  
GI  
PFL  
TH1  
INO  
  
ARTEMIS  
TRP4  
RCN1  
CAL  
  
APT1  
  
LEC2  
OSM1

SQN  
  
SON1  
  
WUS  
EMB2296  
TTN5  
EMB2444  
PHYB  
  
TAG1  
FVE  
PRF1  
HBT  
  
SUR1  
  
EMB2219  
  
SVP  
  
SNG1  
CLF  
  
PKL  
SPIK  
  
ELF3  
EMB1345  
FDH  
GPA1  
ER  
PDE135  
HO2

MT03  
  
EMB1270  
EMB2454  
EMB1865  
TSK  
VRN1  
  
DWF1  
TTN9  
EMB2729  
NDR1  
TTN6  
FIE  
EIN3  
BIN3  
UCU2  
  
TSO1  
DMC1  
AXR2  
SUP  
ETR2  
PHO1  
ALF5  
  
RSY3  
ABI3  
PRT1  
QUA1  
  
GL1  
UVH3

EDM1  
  
SKU5  
  
COP9  
PDE226  
SLR  
FRC3  
FAR1  
RAM1  
  
CLA  
MAA3  
  
ARA1  
FCA  
SPIKE1  
PRZ1  
VRN2  
RPP4  
BAL  
  
SNI1  
CH42  
BIN2  
IRX1  
AG  
  
IRT1  
EMB1025  
LSD1  
MS5  
CRM2  
EMB1417  
FRY2  
TOM1  
IM  
  
RML1  
EMB1290  
TRH1

TFL2  
TRP1  
GDH1  
FS1  
  
ADG2  
ACL5  
AAT2  
PI  
  
NPH4  
TSL  
CHL6  
  
MS1  
EMB1705  
EMB1211  
  
MAM1\*  
HCF136  
HUA2  
SGS3  
EMB1265  
  
EMB2024  
PDE225  
TTG1  
FPF  
  
TNY  
GA3  
  
EMB1138

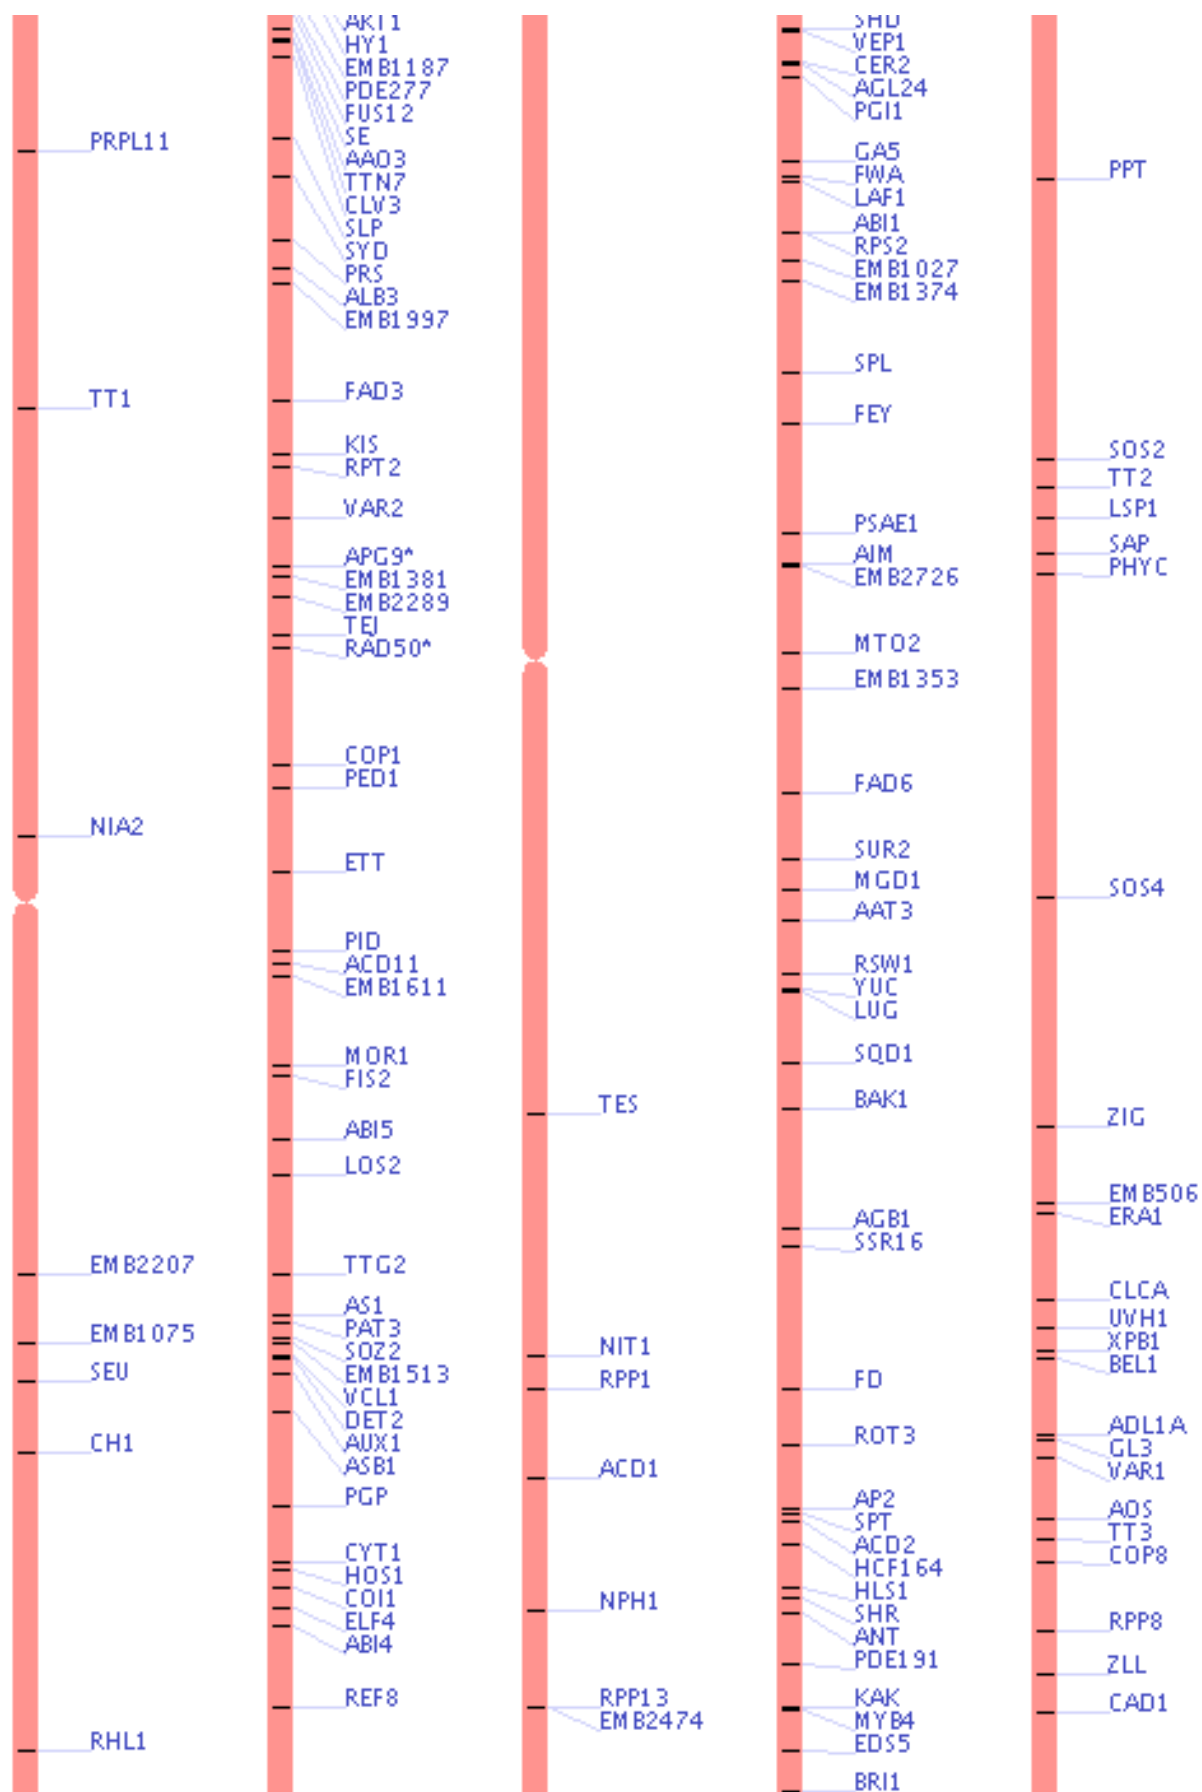

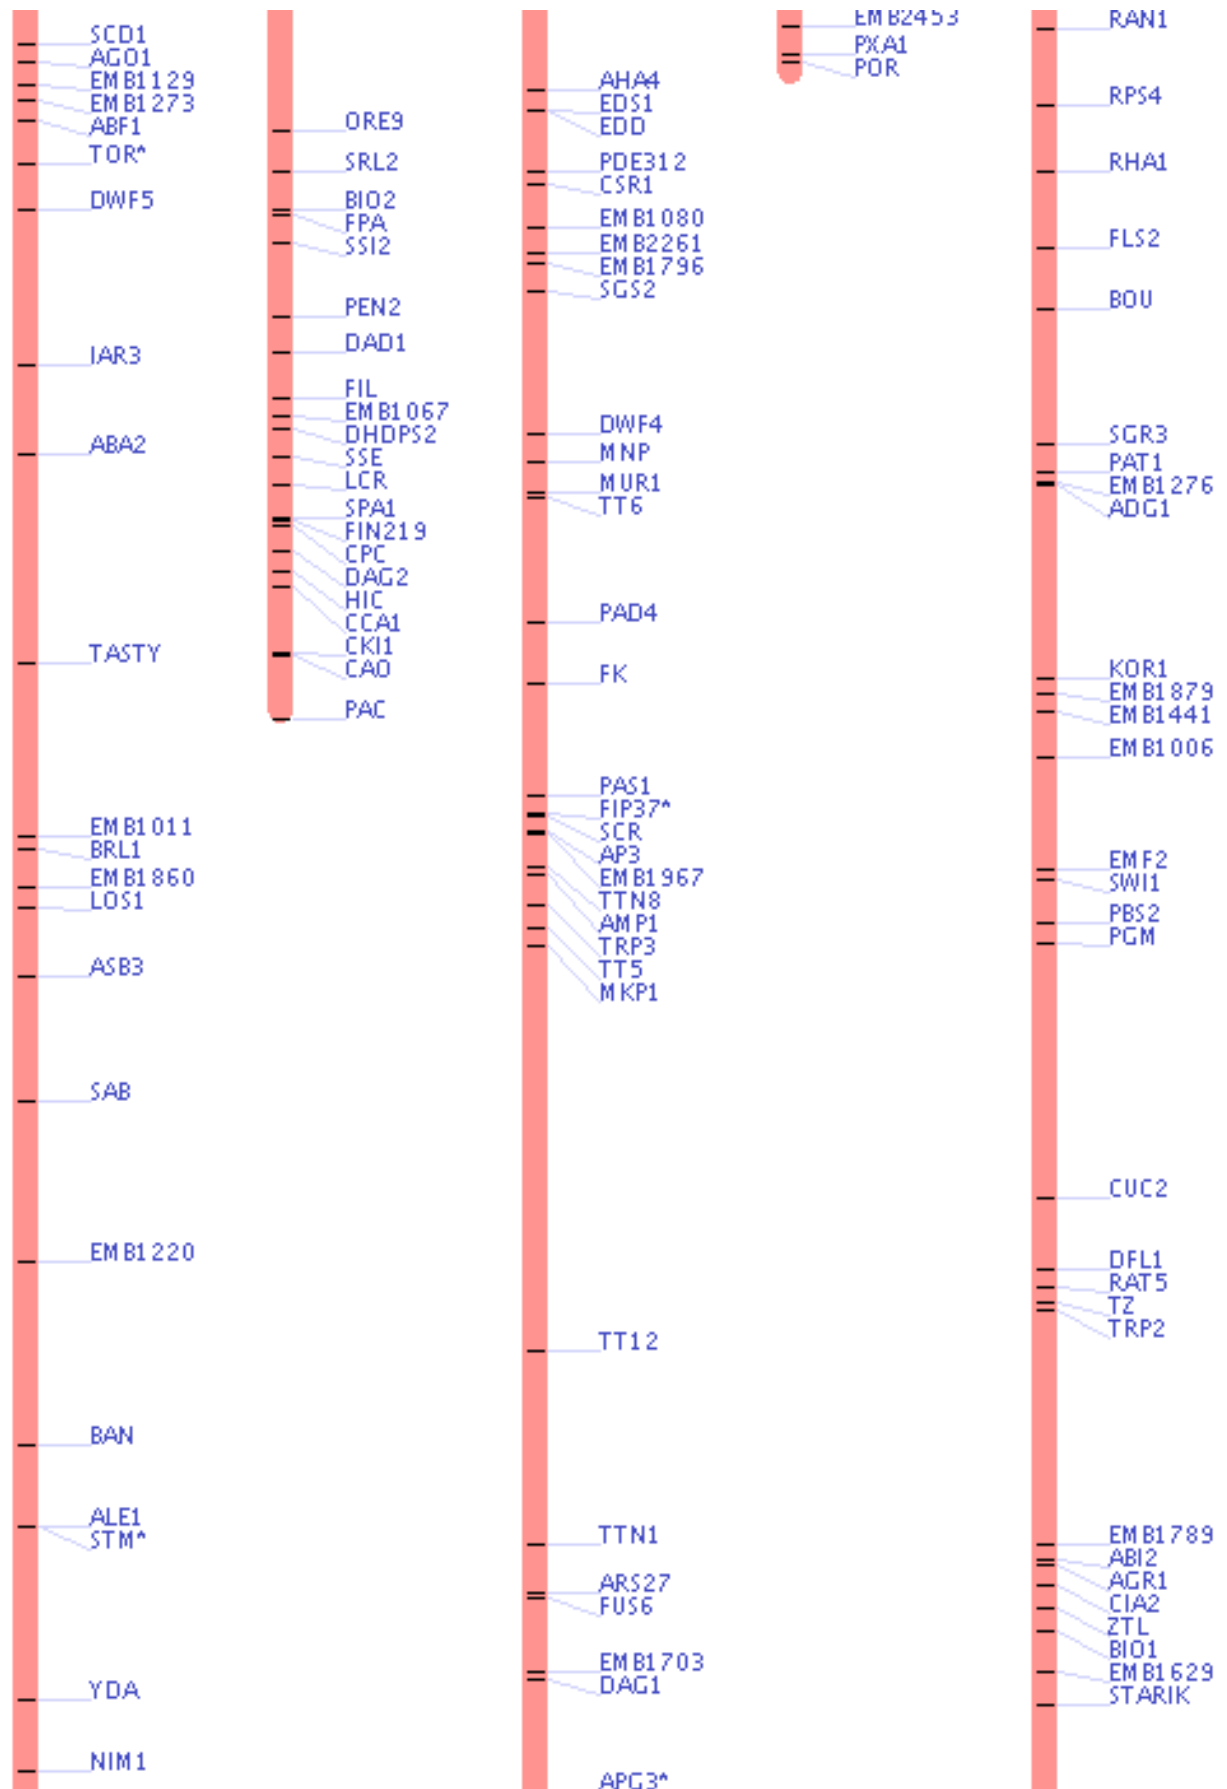

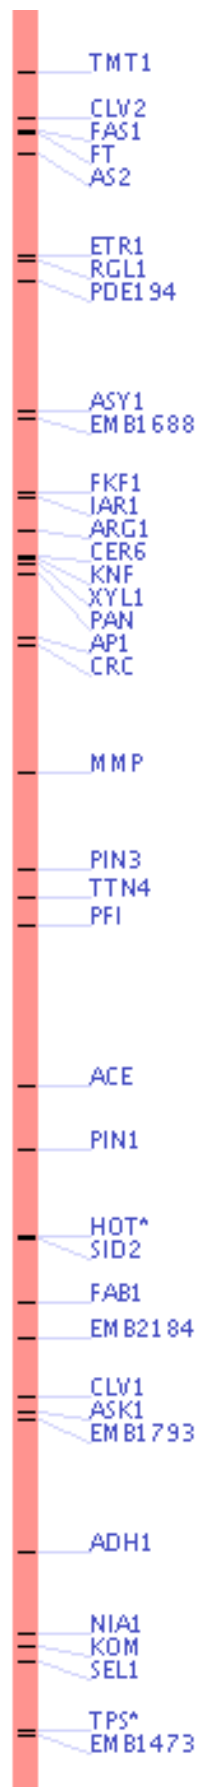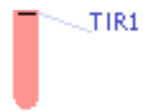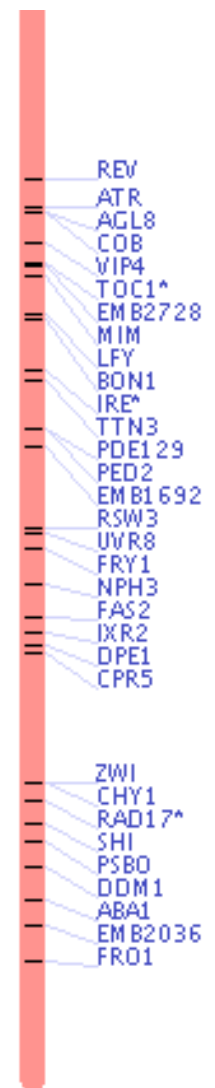

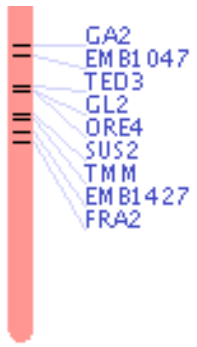

Supplement: plntphys_131_2_409__1.pdf [file plntphys_131_2_409__1.pdf]
